# Supplementary material
Source: PubMed Central journal article supplement (PMC8419698)
Supplement: EMBR-22-e51806-s004.pdf [file EMBR-22-e51806-s004.pdf]

**Table EV2: CHIP-PCR Primers**

| <b>Primer Name</b>   | <b>Sequence (5' to 3')</b> |
|----------------------|----------------------------|
| <i>Atf3</i> Forward  | GAAGTGATGGATGGAAGAGGG      |
| <i>Atf3</i> Reverse  | TGACTCGAGGCGTGAAAGAT       |
| <i>Rab7b</i> Forward | AGAGAGAAGGCTCTCTGACC       |
| <i>Rab7b</i> Reverse | CCAGGGTCATCTGAGTGTGA       |
| <i>Rab9a</i> Forward | GACCTCTGCTGCCAAGTAGT       |
| <i>Rab9a</i> Reverse | TCATCCACAGGTTGCTTTCGT      |
