# Supplementary material
Source: PubMed Central journal article supplement (PMC8419698)
Supplement: EMBR-22-e51806-s008.pdf [file EMBR-22-e51806-s008.pdf]

**Table EV1: qRT-PCR Primers**

| <b>Primer Name</b>                 | <b>Sequence (5' to 3')</b> | <b>Source</b>                 |
|------------------------------------|----------------------------|-------------------------------|
| <i>Actin</i> (human)<br>Forward    | CTGACTGACTACCTCATGAAGATCCT | Progida <i>et al.</i> , 2010  |
| <i>Actin</i> (human)<br>Reverse    | CTTAATGTCACGCACGATTTCC     | Progida <i>et al.</i> , 2010  |
| <i>ATF3</i> (human)<br>Forward     | GGAGTGCCTGCAGAAAGAGT       | Edagawa <i>et al.</i> , 2014  |
| <i>ATF3</i> (human)<br>Reverse     | CCATTCTGAGCCCGGACAAT       | Edagawa <i>et al.</i> , 2014  |
| <i>RAB7B</i><br>(human)<br>Forward | GGCCAGCATCCTCTCCAAGATTATC  | Progida <i>et al.</i> , 2010  |
| <i>RAB7B</i><br>(human)<br>Reverse | GATGCAGCCATCGGAGCCCTTGT    | Progida <i>et al.</i> , 2010  |
|                                    |                            |                               |
| <i>Atf3</i> (mouse)<br>Forward     | ACAACAGACCCCTGGAGATG       | Fazio <i>et al.</i> , 2017    |
| <i>Atf3</i> (mouse)<br>Reverse     | CCTTCAGCTCAGCATTACACA      | Fazio <i>et al.</i> , 2017    |
| <i>TBP</i> (mouse)<br>Forward      | CAAACCCAGAATTGTTCTCCTT     | Burclaff <i>et al.</i> , 2016 |
| <i>TBP</i> (mouse)<br>Reverse      | ATGTGGTCTTCCTGAATCCCT      | Burclaff <i>et al.</i> , 2016 |
| <i>Rab5</i> (mouse)<br>Forward     | TGGTTCTTCGCTTTGTGAAAGG     | Zeigerer <i>et al.</i> , 2015 |
| <i>Rab5</i> (mouse)<br>Reverse     | GCTATGATACCGTTCTTGACCAG    | Zeigerer <i>et al.</i> , 2015 |
| <i>Rab7a</i> (mouse)<br>Forward    | GCGGCCTGCGTTGTG            | Li <i>et al.</i> , 2005       |
| <i>Rab7a</i> (mouse)<br>Reverse    | CACTTTCTTCCTAGAGGTCATCCTT  | Li <i>et al.</i> , 2005       |
| <i>Rab7b</i> (mouse)<br>Forward    | TCGAGGAATACCAGACCACA       | Ruas <i>et al.</i> , 2014     |
| <i>Rab7b</i> (mouse)<br>Reverse    | GCTTCAAAGTTGTGTCATCCAA     | Ruas <i>et al.</i> , 2014     |
| <i>Rab9</i> (mouse)<br>Forward     | CCTTCTTCCTGCCCTGGTT        | Li <i>et al.</i> , 2005       |
| <i>Rab9</i> (mouse)<br>Reverse     | CATCATTATCTTGCAGACACACT    | Li <i>et al.</i> , 2005       |
